# Supplementary material
Source: HighWire-hosted journal article supplement (https://www.cmaj.ca/highwire/filestream/58242/field_highwire_adjunct_files/5/gender-kaul-online_appendix_6.pdf)
Supplement: gender-kaul-online_appendix_6.pdf [file gender-kaul-online_appendix_6.pdf]

**Appendix 6:** Multivariable analysis of factors associated with death within 1 year following index emergency department visit among patients who presented with acute myocardial infarction, unstable angina, stable angina or chest pain

| Factor                              | Presenting condition; adjusted hazard ratio* (95% confidence interval) |                  |                  |                  |
|-------------------------------------|------------------------------------------------------------------------|------------------|------------------|------------------|
|                                     | Acute myocardial infarction                                            | Unstable angina  | Stable angina    | Chest pain       |
| Age                                 | 1.06 (1.06-1.07)                                                       | 1.07 (1.06-1.08) | 1.09 (1.08-1.10) | 1.06 (1.06-1.07) |
| Female sex                          | –                                                                      | 0.60 (0.46-0.78) | 0.60 (0.46-0.78) | 0.74 (0.63-0.87) |
| Discharge from emergency department | 1.53 (1.01-2.30)                                                       | –                | 0.60 (0.45-0.81) | 0.30 (0.25-0.36) |
| Diabetes mellitus                   | 1.26 (1.04-1.52)                                                       | 1.61 (1.22-2.13) | –                | –                |
| Hypertension                        | –                                                                      | –                | –                | 0.57 (0.45-0.73) |
| Congestive heart failure            | 1.36 (1.14-1.63)                                                       | 2.08 (1.54-2.80) | 2.44 (1.65-3.63) | –                |
| Cancer                              | 1.85 (1.46-2.35)                                                       | –                | 2.12 (1.34-3.35) | 4.04 (3.09-5.27) |
| Cerebrovascular disease             | 1.33 (1.06-1.66)                                                       | 1.54 (1.11-2.13) | 1.73 (1.11-2.71) | 1.92 (1.47-2.51) |
| Renal disease                       | 2.62 (2.02-3.42)                                                       | 3.52 (2.31-5.38) | 3.26 (1.53-6.96) | 2.34 (1.22-4.46) |
| Cardiac dysrhythmias                | 2.09 (1.77-2.47)                                                       | 1.81 (1.39-2.36) | –                | –                |
| Peripheral vascular disease         | 1.30 (1.01-1.67)                                                       | –                | –                | –                |
| Metro resident†                     | 0.85 (0.73-1.00)                                                       | 0.81 (0.63-1.03) | –                | 1.28 (1.08-1.52) |
| Income quartile                     |                                                                        |                  |                  |                  |
| ≤ \$39 191‡                         | –                                                                      | 1.00             | 1.00             | 1.00             |
| \$39 192-\$49 975                   | –                                                                      | 1.12 (0.82-1.53) | 0.70 (0.50-0.97) | 1.08 (0.89-1.32) |
| \$49 976-\$63 581                   | –                                                                      | 0.75 (0.53-1.06) | 0.86 (0.61-1.20) | 0.82 (0.65-1.02) |
| ≥ \$63 582                          | –                                                                      | 0.83 (0.59-1.18) | 0.66 (0.44-1.01) | 0.80 (0.63-1.02) |
| Revascularization§                  | 0.75 (0.60-0.93)                                                       | 0.64 (0.45-0.90) | –                | 0.70 (0.45-1.09) |

\*Adjusted for age, sex, comorbidities and socioeconomic factors. Missing values indicate that the variable was not retained in the model for the presenting condition.

†Patient lives in Edmonton or Calgary.

‡Reference category.

§Revascularization included as a time-dependent variable.
